# Supplementary material
Source: Springer Nature journal article supplement (https://www.springermedizin.de/resource/supplementary/12884_2012_711_MOESM5_ESM.pdf/9458526)

Figure 4: Barriers to fathers' involvement during pregnancy

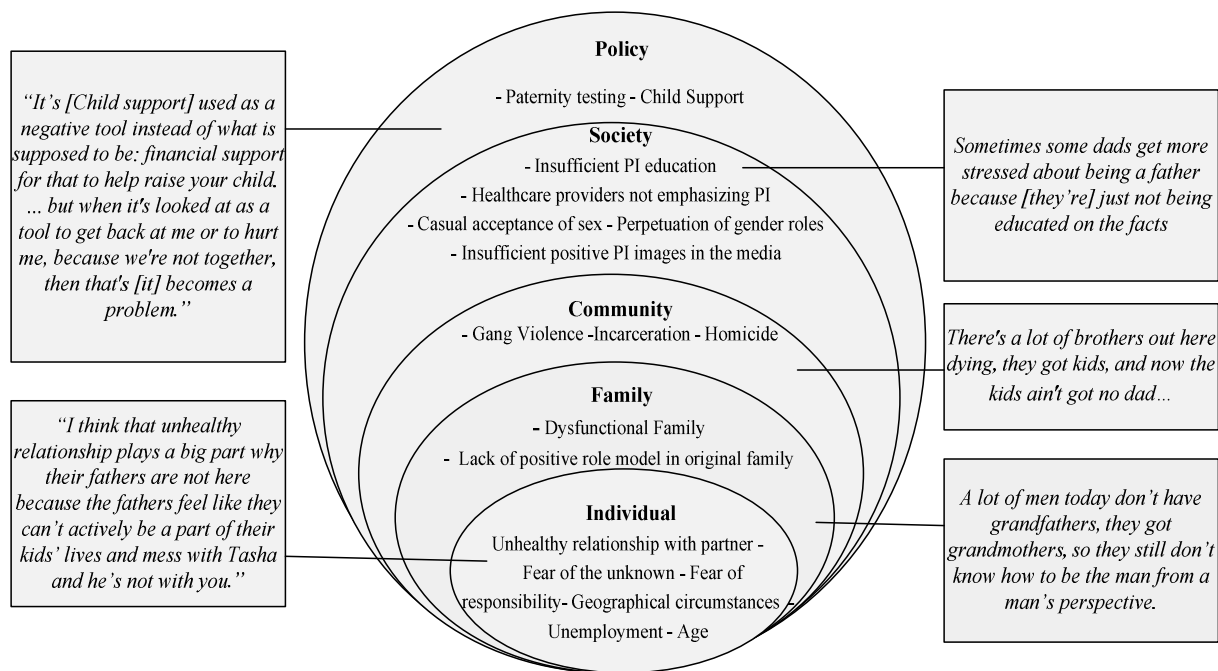

Supplement: MOESM5 [file 9458526]
